# Supplementary material for: The Pandemic, Infodemic, and People’s Resilience in India: Viewpoint
Source: PubMed Central journal article supplement (PMC8658220; doi:10.2196/31645), 2021-12-08
Supplement: publichealth_v7i12e31645_app1.pdf [file publichealth_v7i12e31645_app1.pdf]

# Pandemic, Panic and Peoples Resilience - Experience from India

## Election campaign in Assam

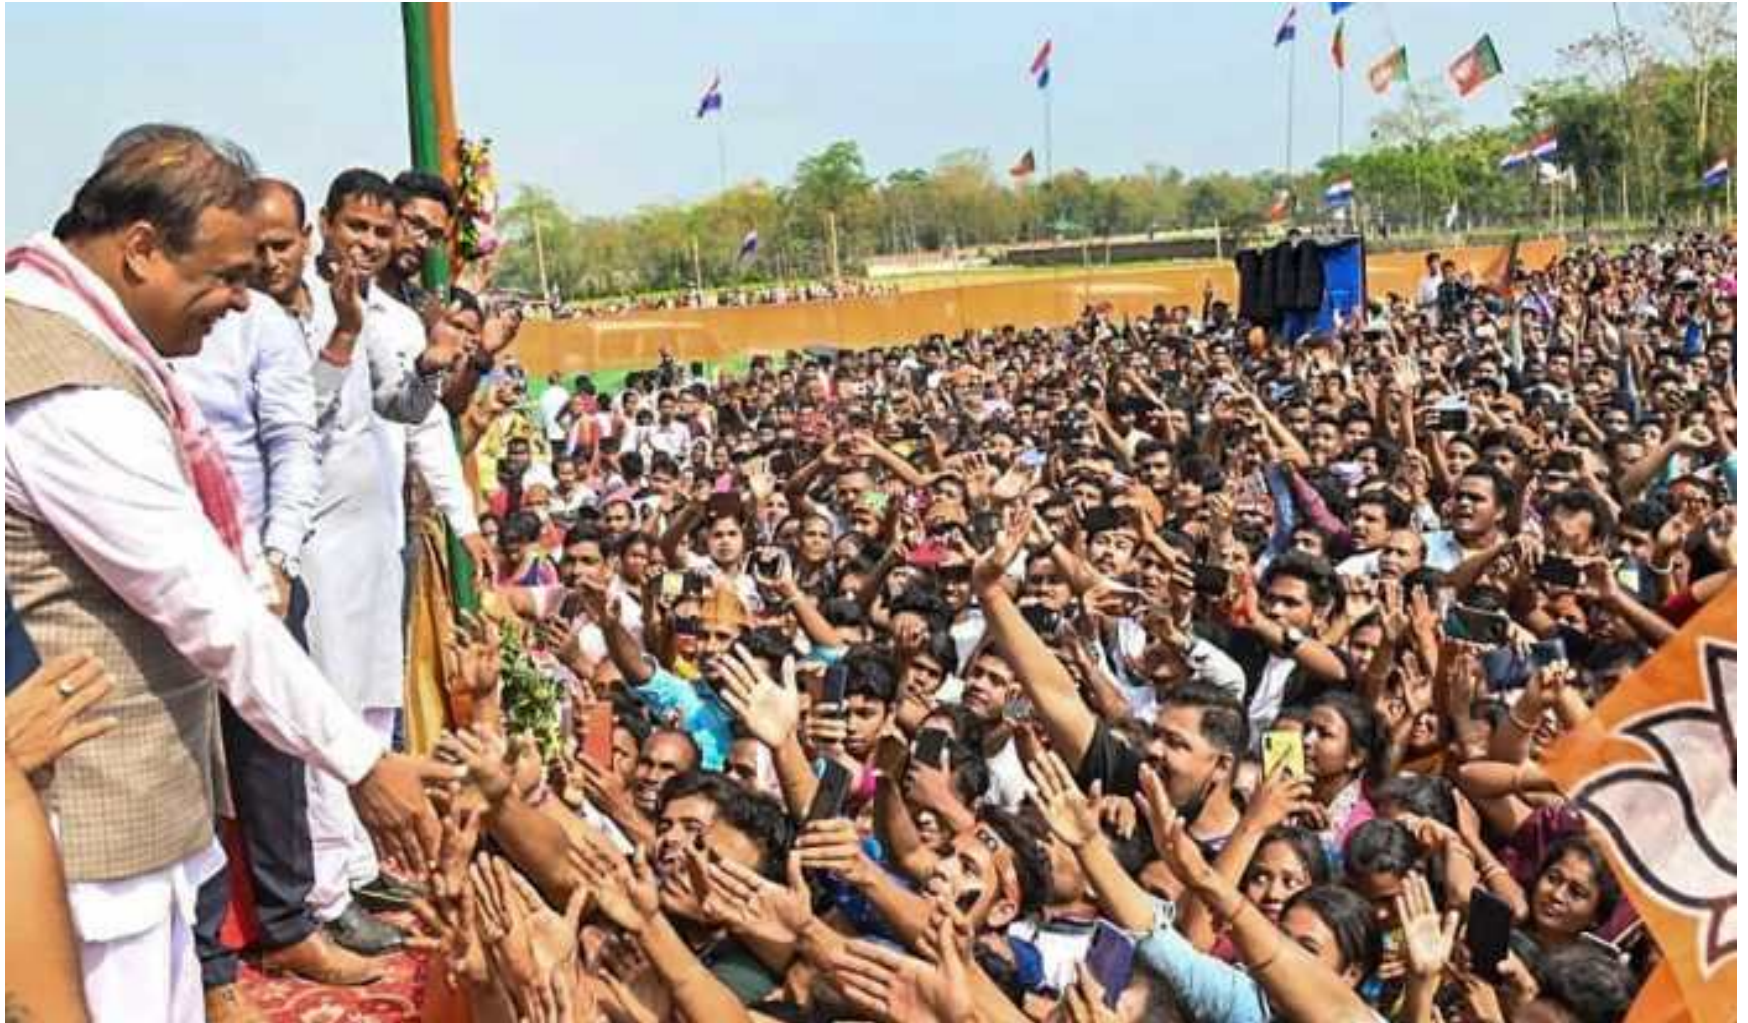

An election campaign rally at Guwahati in Assam (North-eastern part of India) during Assembly election 2021. Source: Zee News; Dated: April 4, 2021



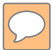

## Election campaign in Assam

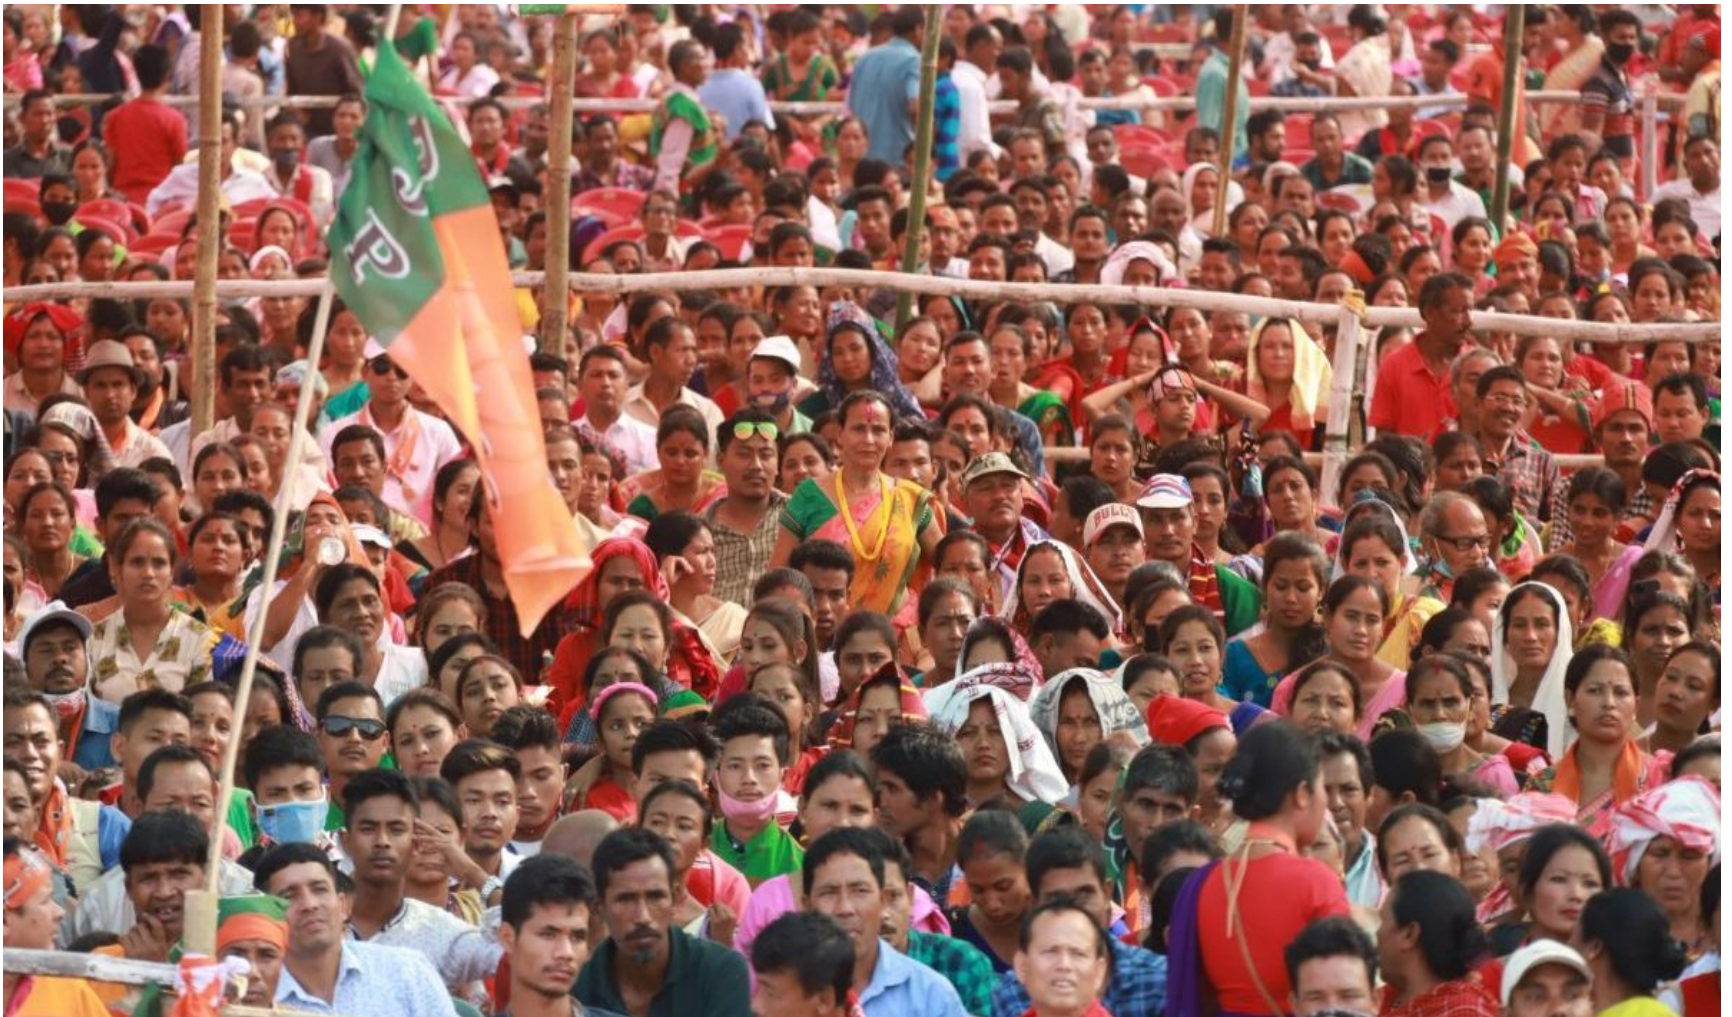

An election campaign at Majuli in Assam (North-eastern part of India) during Assembly election 2021. Source: The Print; Dated: March 24, 2021



## Election campaign in West Bengal

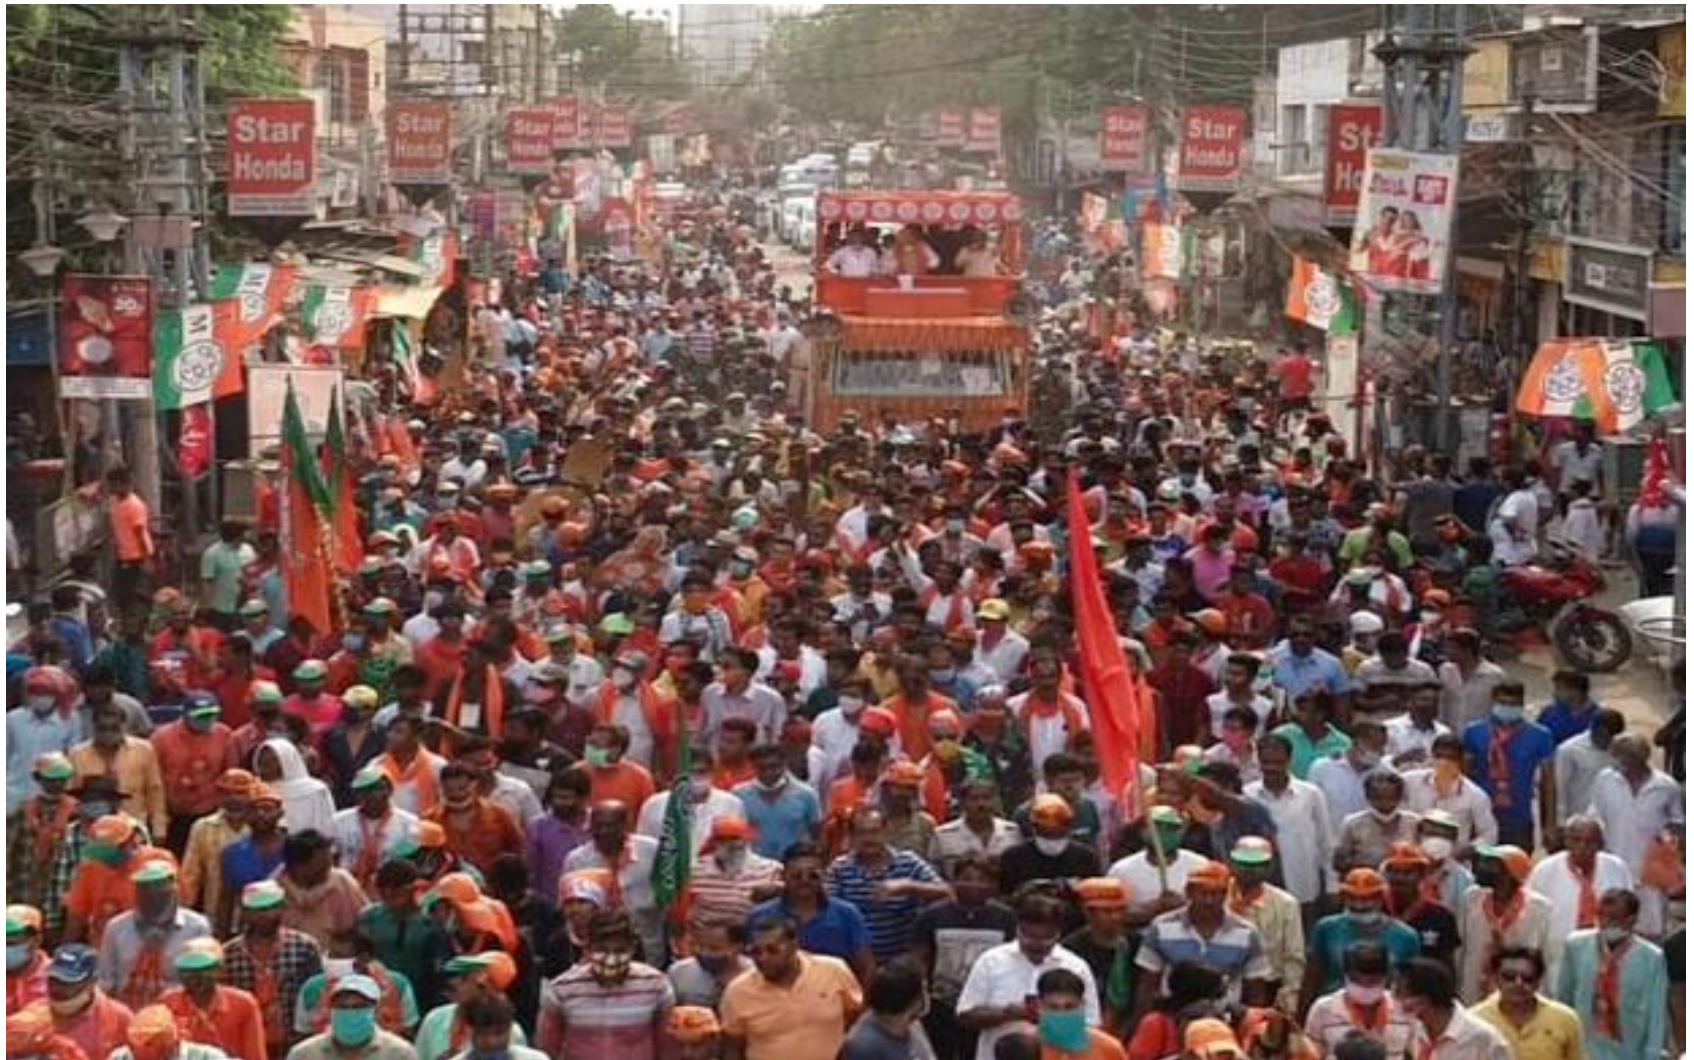

A road show held at election campaign in West Bengal (Eastern part of India) during Assembly election 2021. Source: Business Standard; Dated: April 16, 2021



## Election campaign in West Bengal

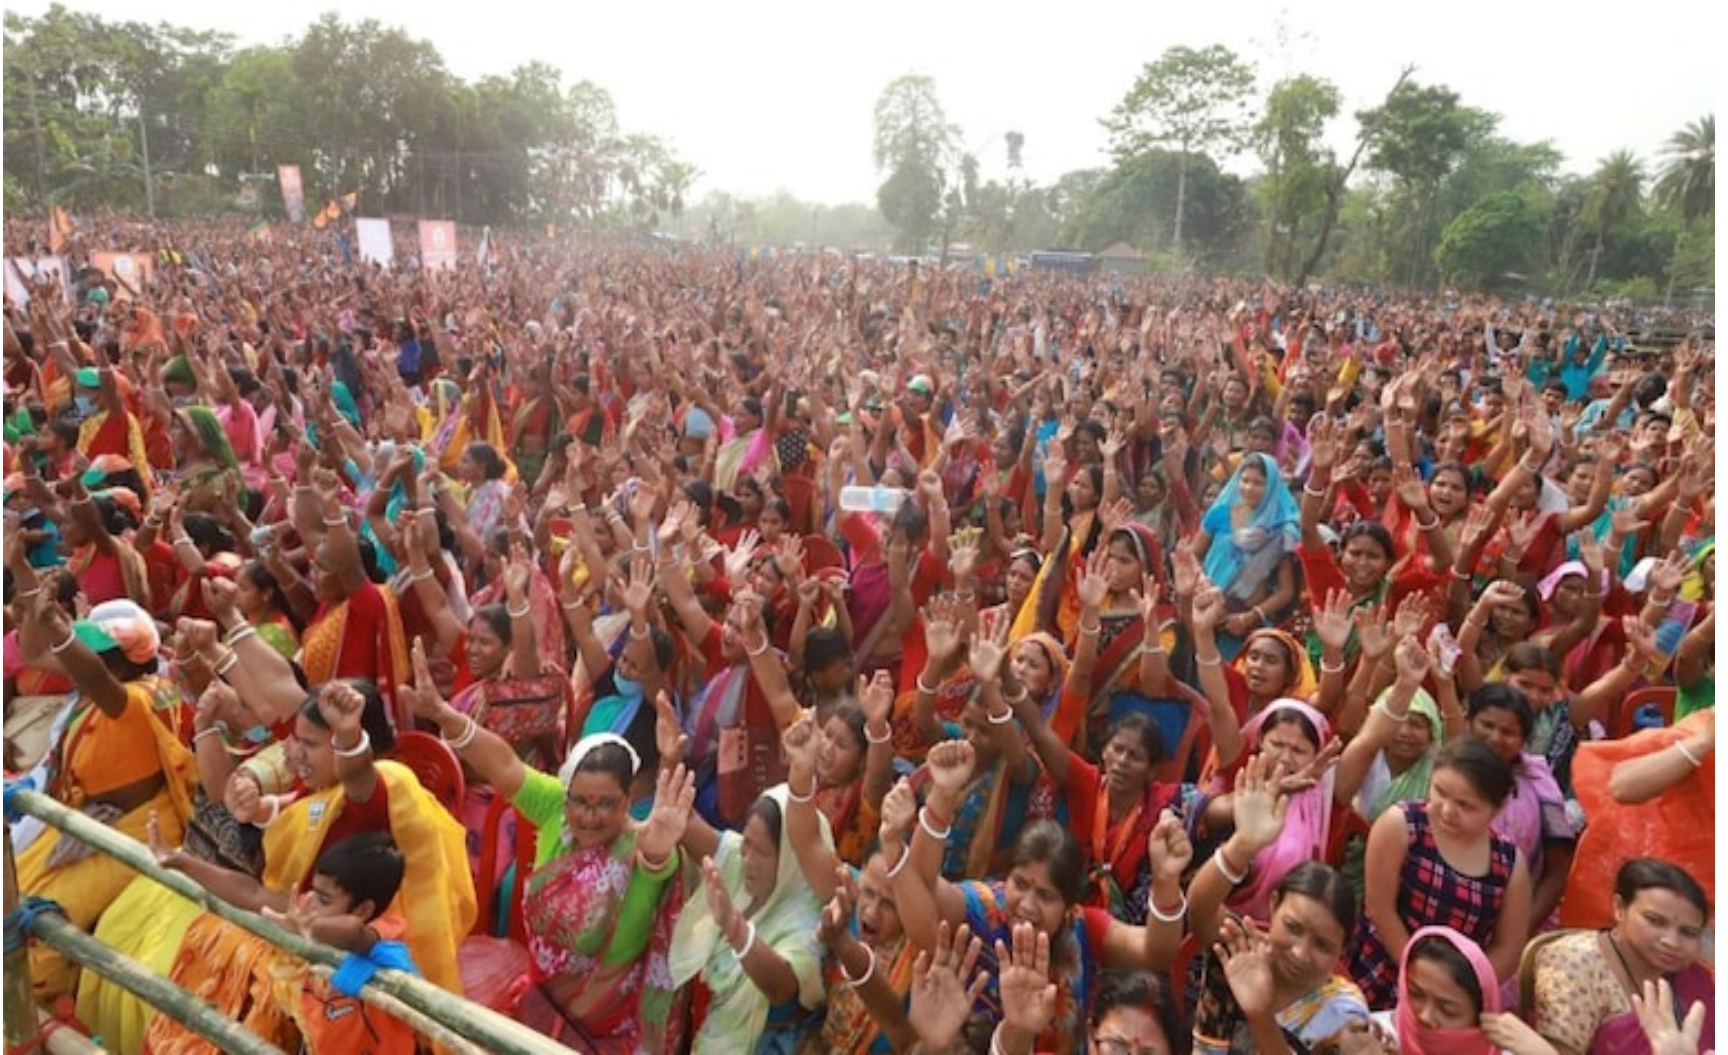

An election campaign in West Bengal (Eastern part of India) during Assembly election 2021. Source: India Today; Dated: April 13, 2021



## Election campaign in Tamil Nadu

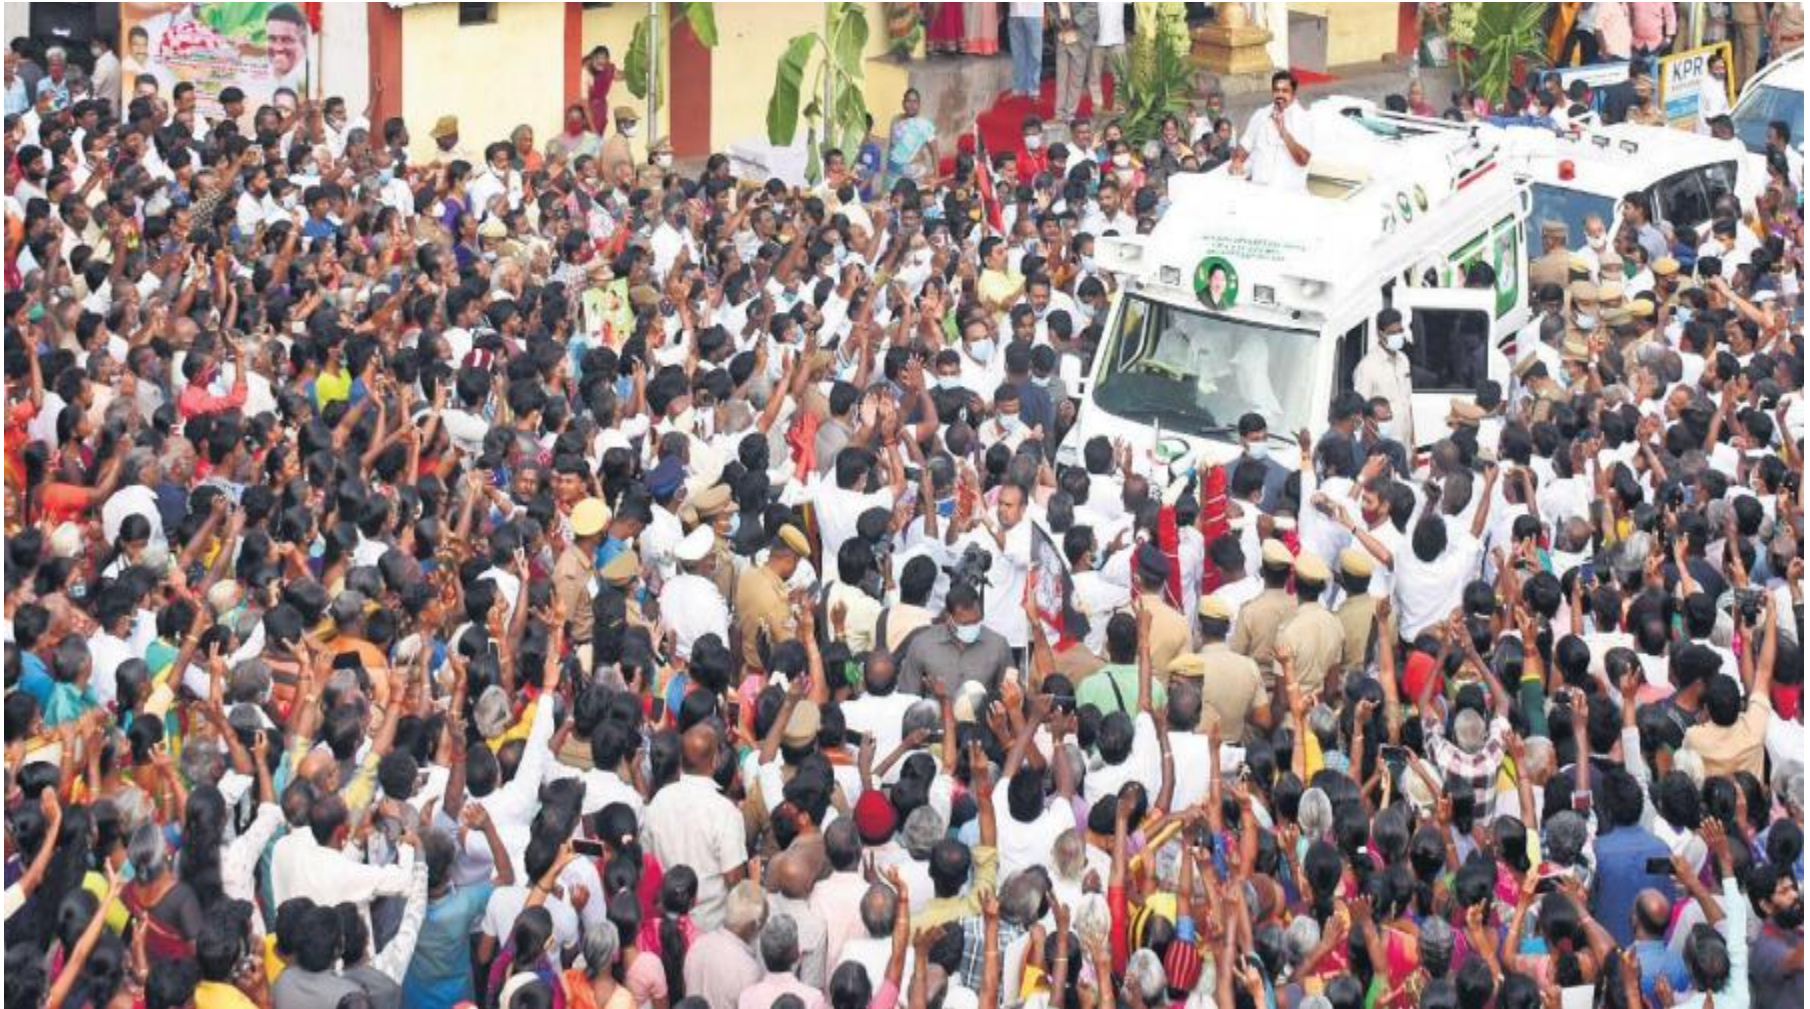

Addressing a crowd during a road rally in election campaign at Puliyakulam in Comibatore, Tamil Nadu (Southern part of India). Source: The New Indian Express; Dated: March 22, 2021



## Kumbh Mela procession in Haridwar

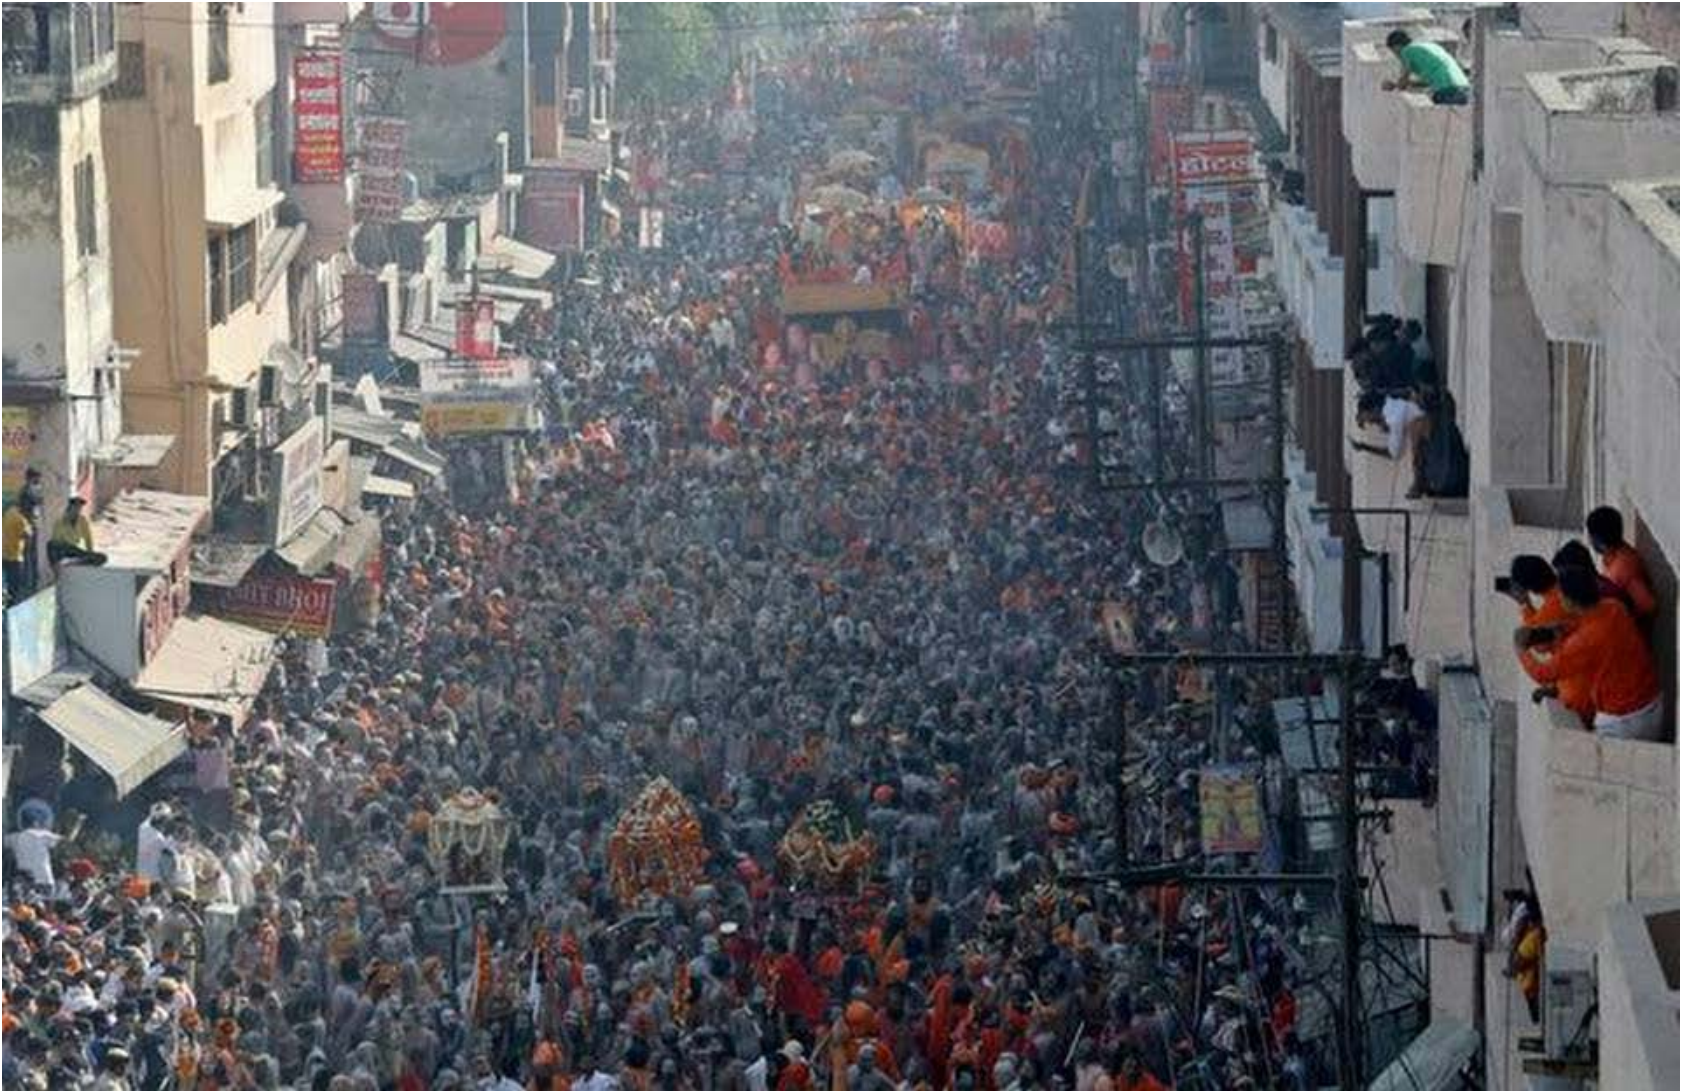

Procession to take a dip in the river Ganges during Shahi Shah at Kumbh Mela in Haridwar (Northern part of India). Source: The Hindu; Dated: April 14, 2021



## Kumbh Mela Holy dip at the Ganges

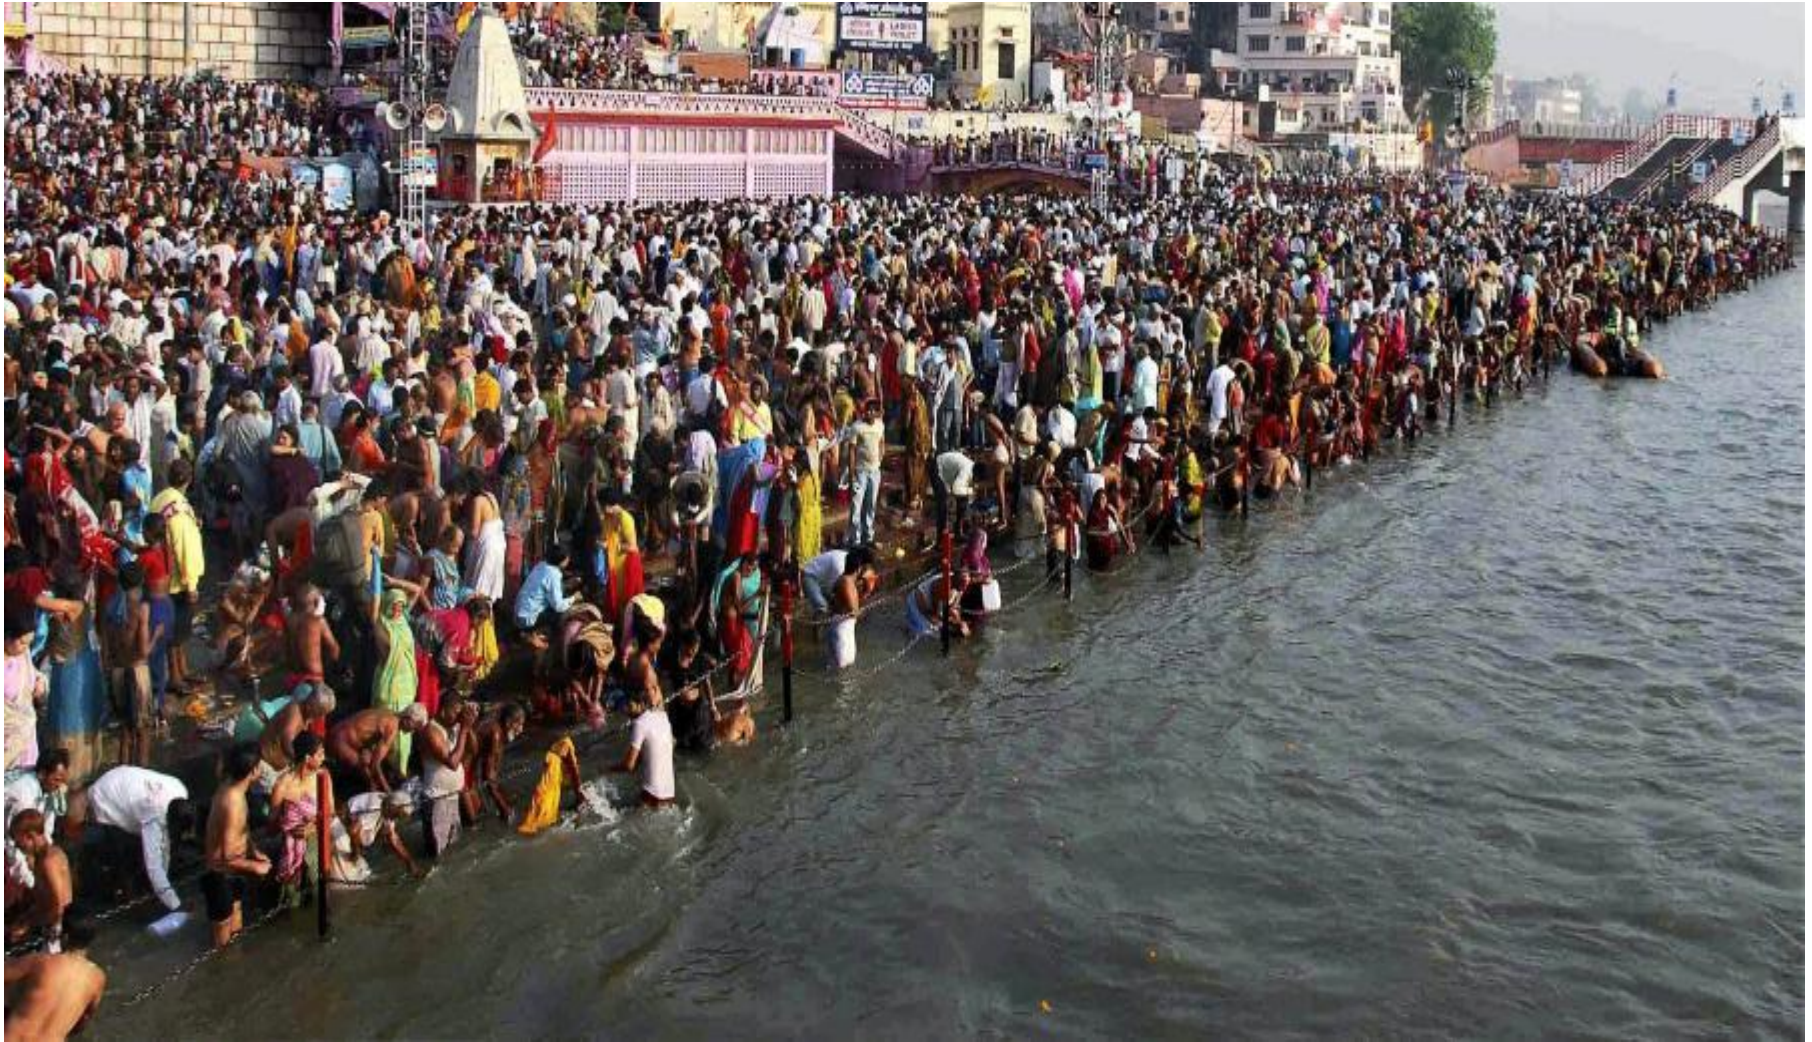

Taking a holy dip in the river Ganges during Shahi Shah at Kumbh Mela in Haridwar. Source: The New Indian Express; Dated: April 15, 2021



## Religious procession in Gujarat

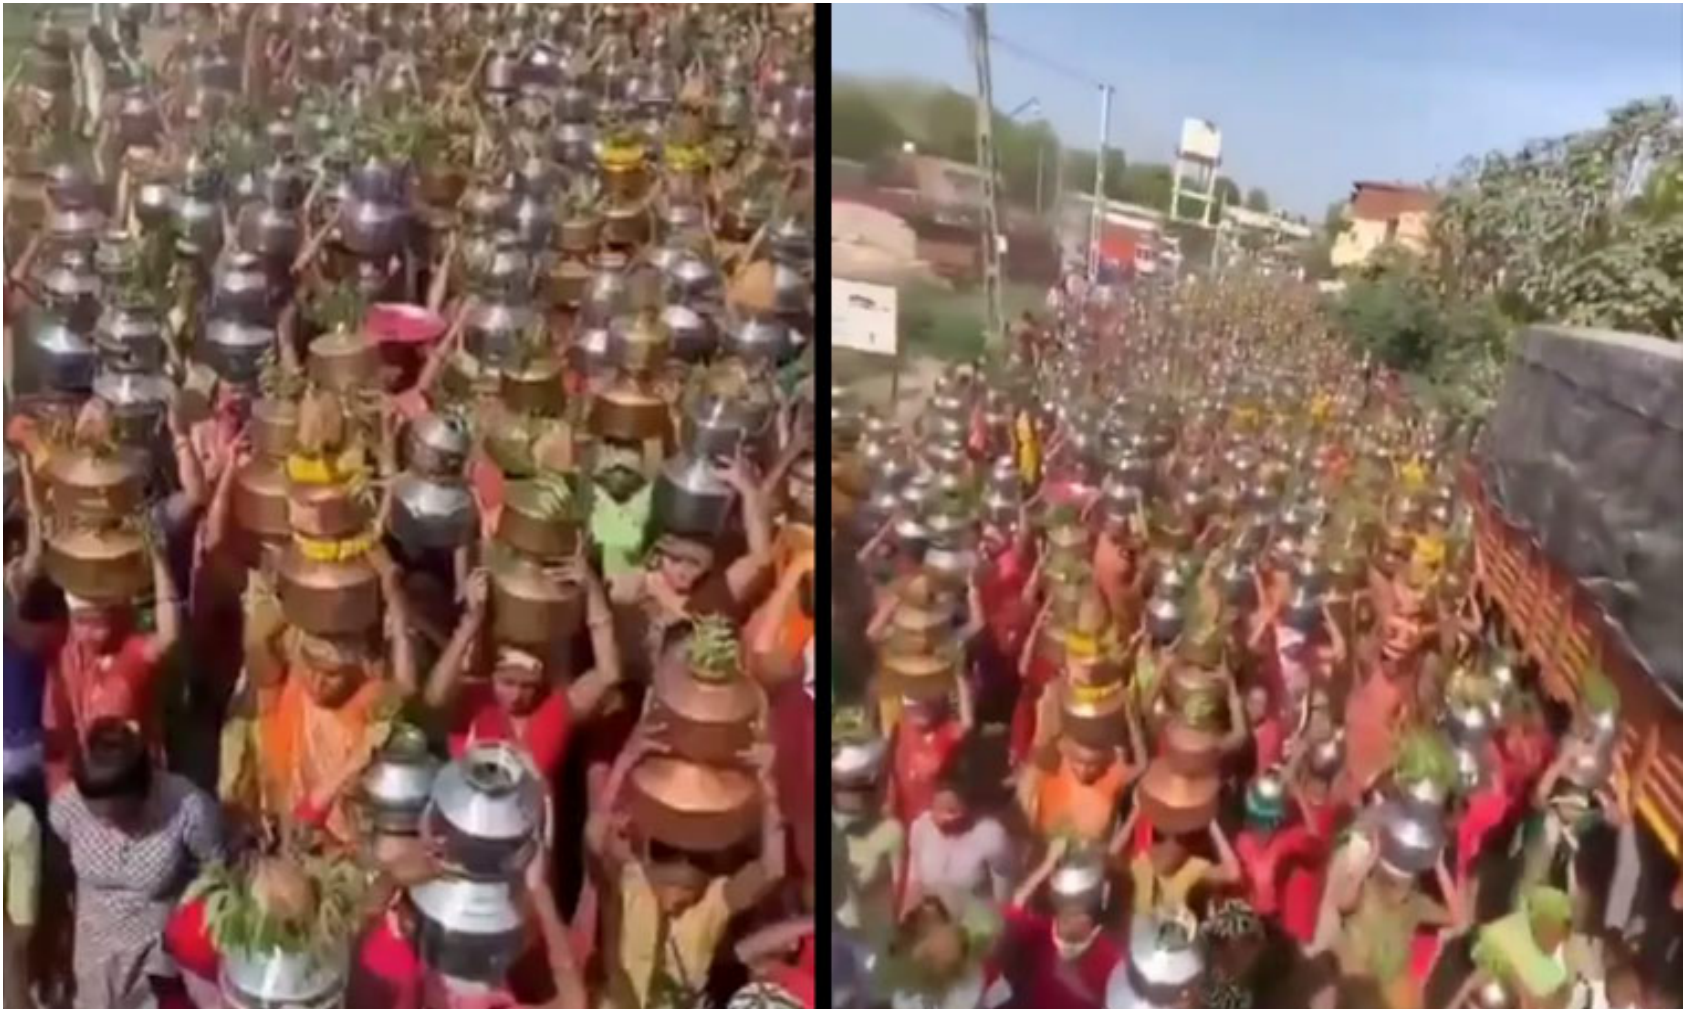

Large number of women turned up at a religious event organized in Navapura village in Ahmedabad district, Gujarat (Western part of India) to eradicate coronavirus. Source: The Week; Dated: May 5, 2021



## Massive exodus of migrant workers

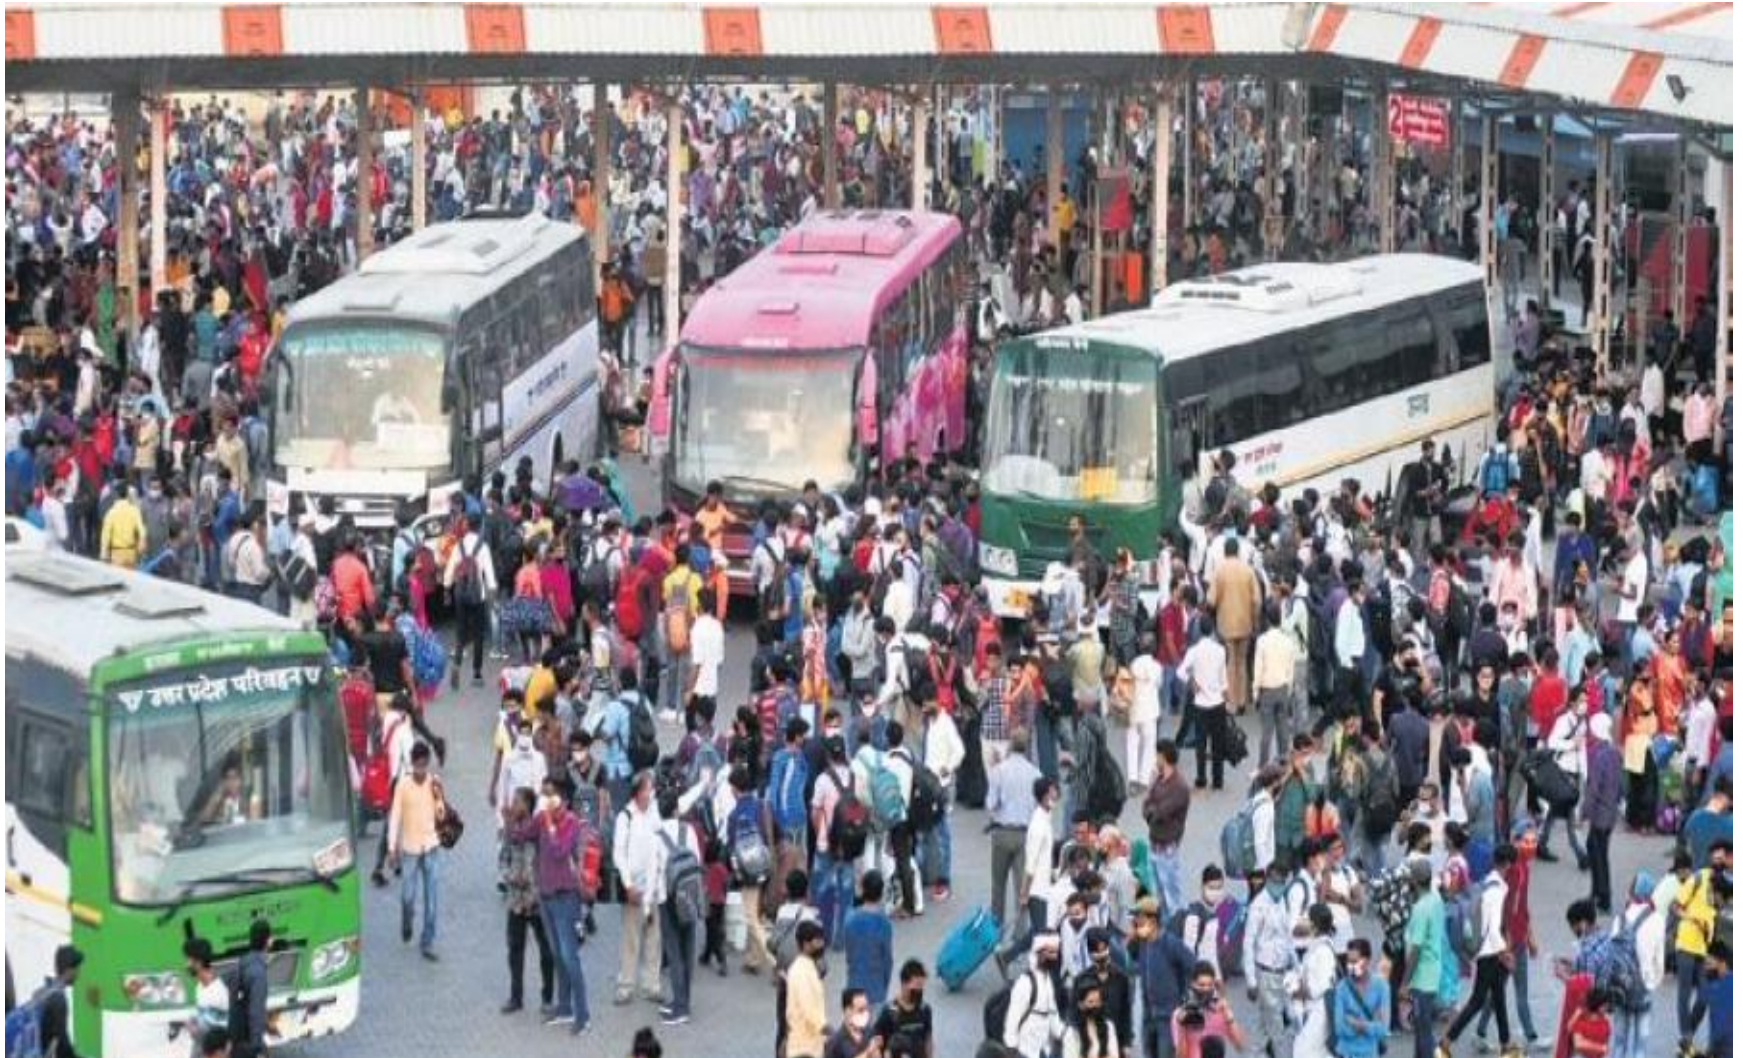

Massive exodus of migrant workers wait to catch a bus at Kaushambi bus stand, Anand Vihar in East Delhi after lockdown announced in Delhi (Northern part of India). Source: The New Indian Express; Dated: April 20, 2021



## Two to a bed in Delhi hospital

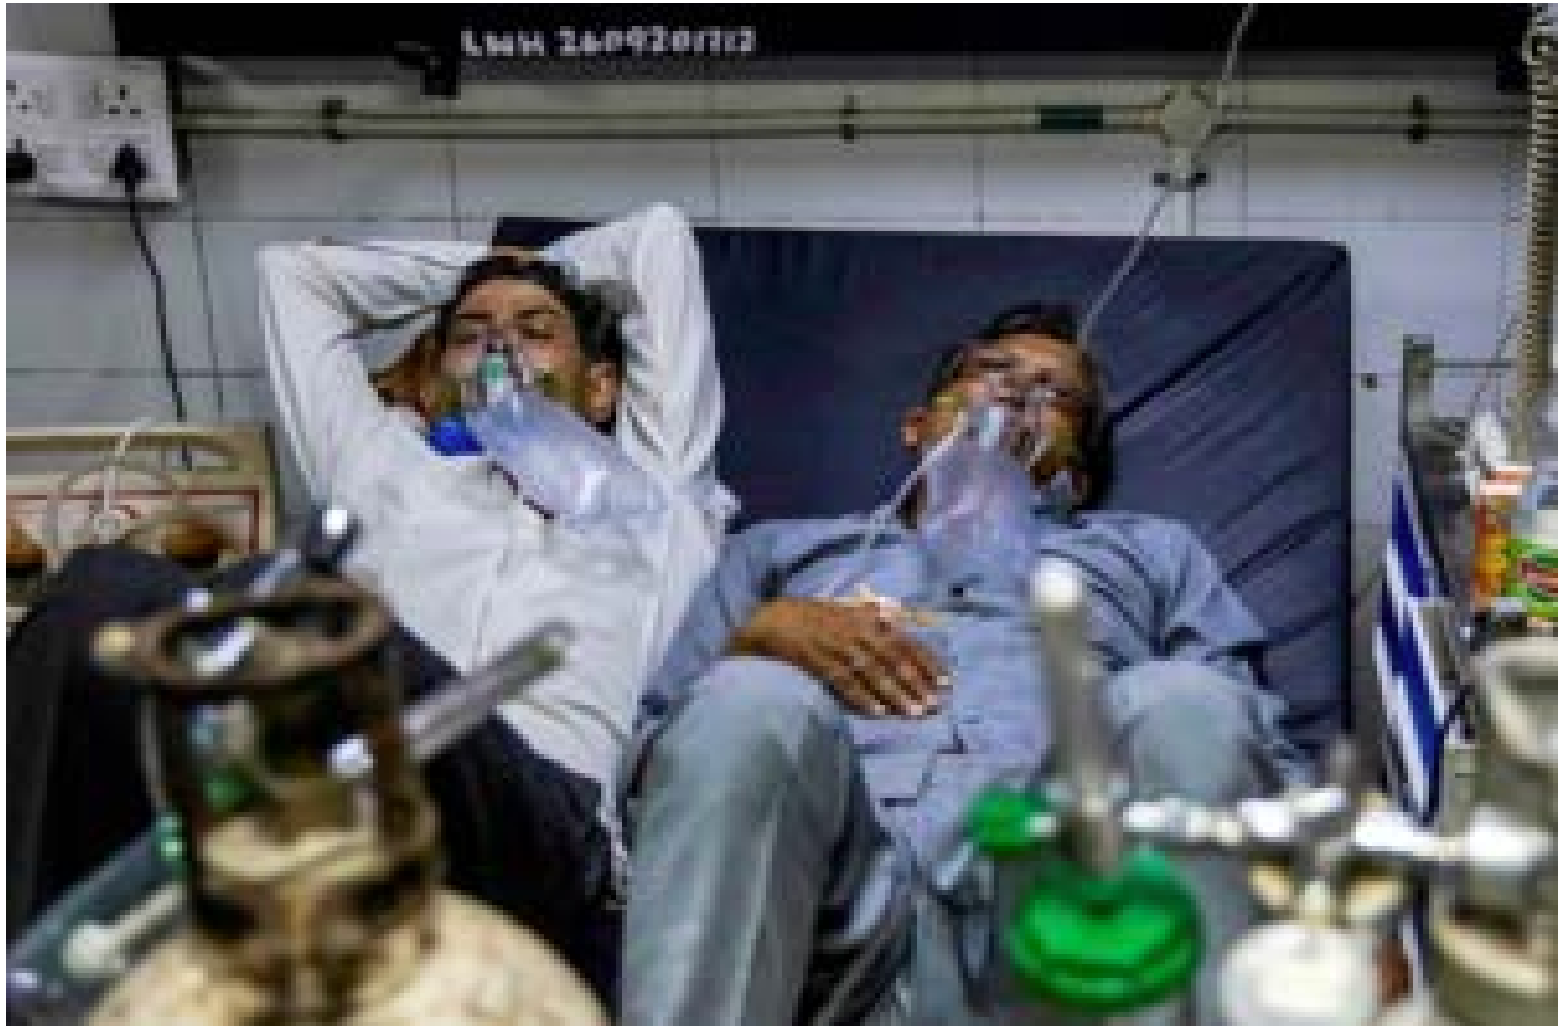

At Lok Nayak Jai Prakash Narayan Hospital in New Delhi, one of India's largest COVID-only facilities with more than 1,500 beds, a stream of ambulances ferried patients to the overflowing casualty ward. Source: The Economic Times; Dated: April 15, 2021



## Long wait for beds with oxygen supply

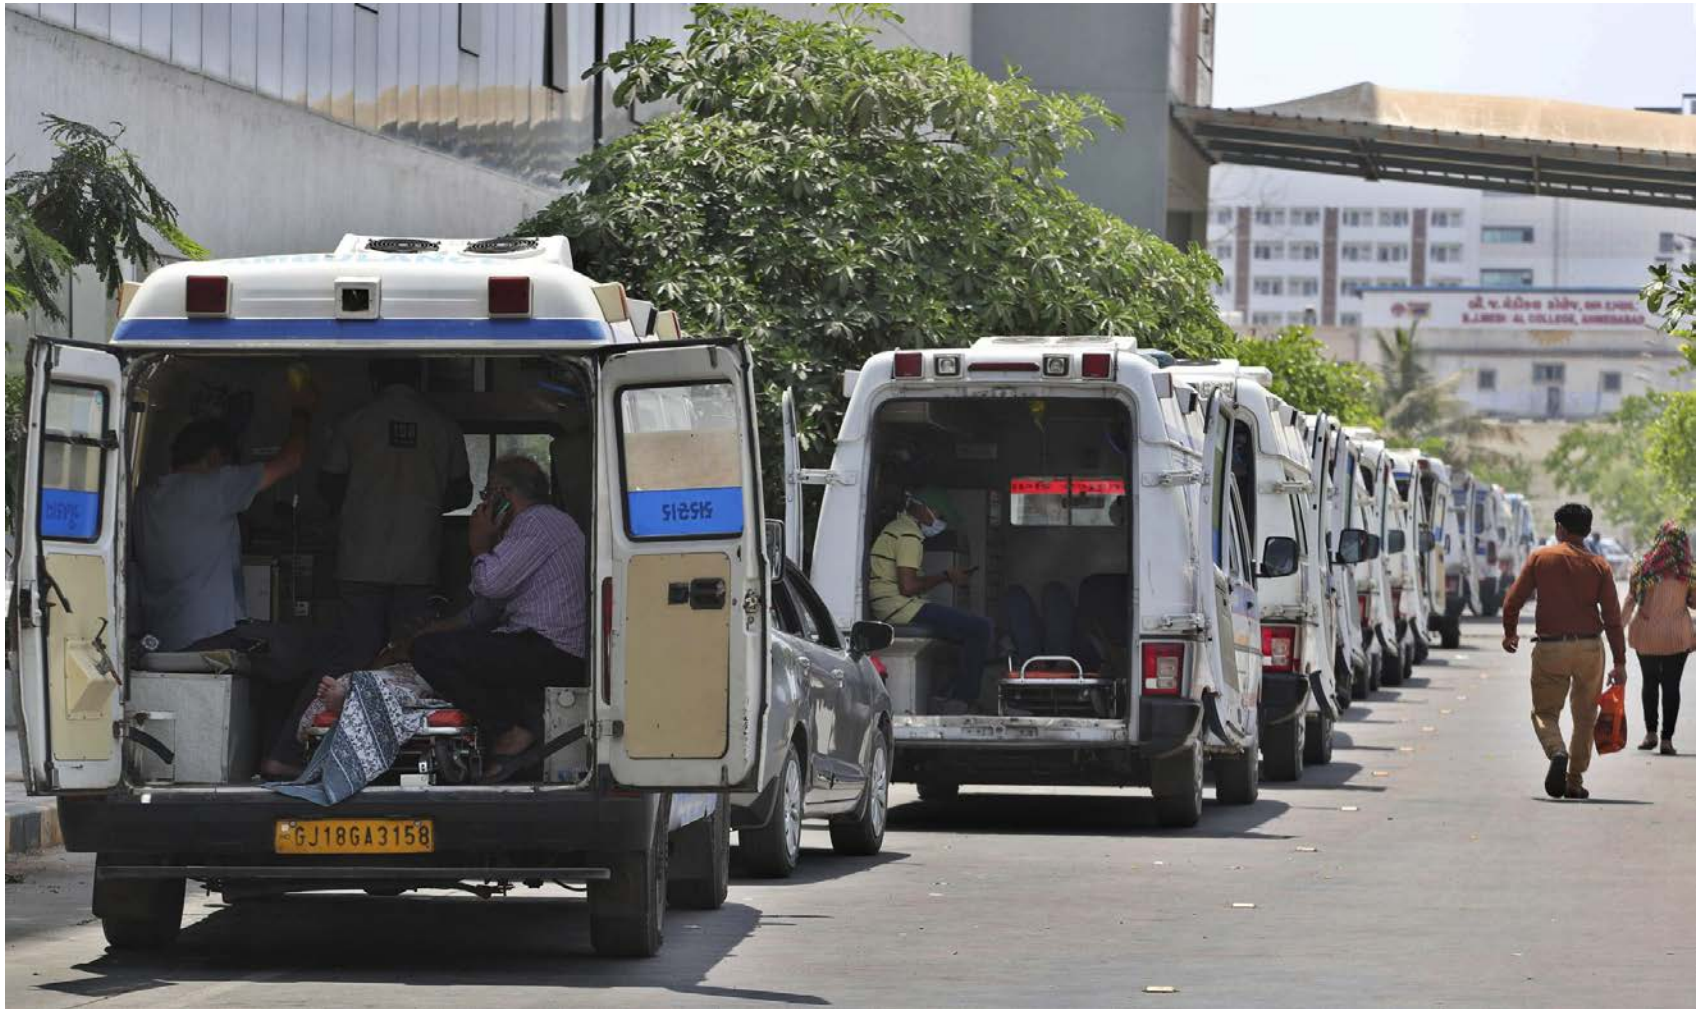

Ambulances carrying COVID-19 patients line up waiting for their turn to be attended to at a dedicated COVID-19 government hospital in Ahmedabad, Gujarat (Western part of India). Source: AP News; Dated: April 15, 2021

## People queueing for oxygen refills in Uttar Pradesh

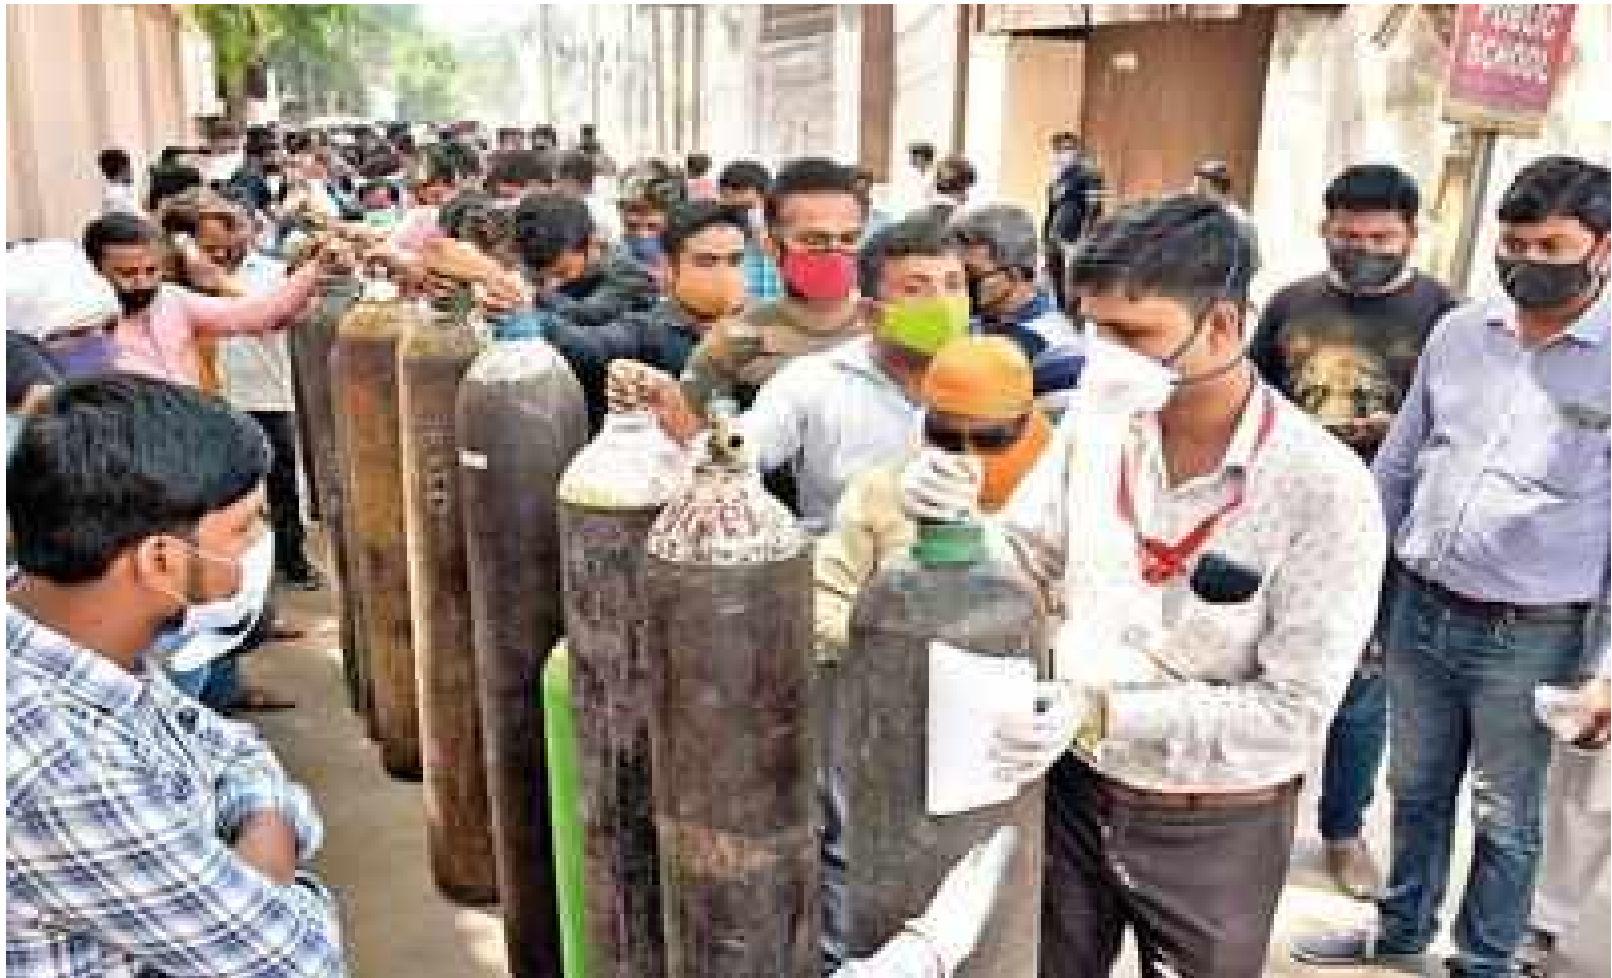

Long queue outside an oxygen plant in Talkatora, Lucknow, Uttar Pradesh (Northern part of India) to get oxygen refill. Source: The Times of India; Dated: April 24, 2021



## People queueing for oxygen refills in Delhi

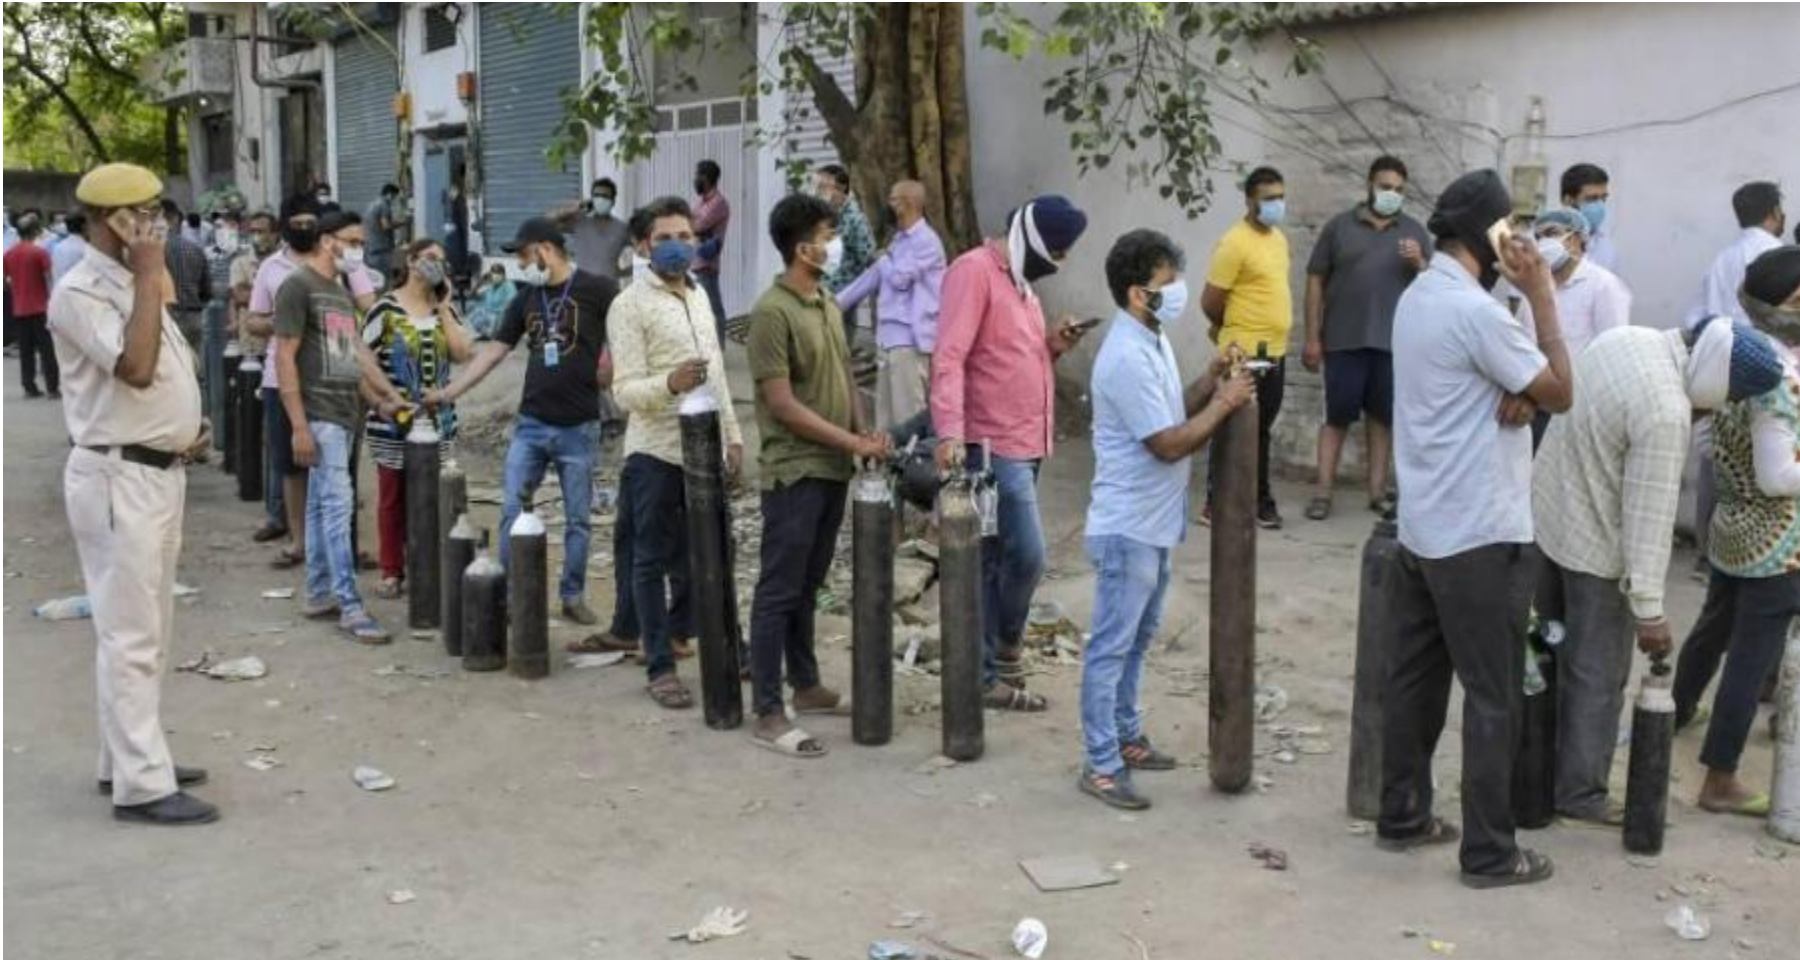

Family members of COVID-19 patients wait outside an oxygen-filling center to refill their empty cylinders as demand for oxygen rises due to spike in corona virus cases at Mayapuri in New Delhi (Northern part of India). Source: The New Indian Express; Dated: April 23, 2021

# Funeral pyres at a crematorium ground

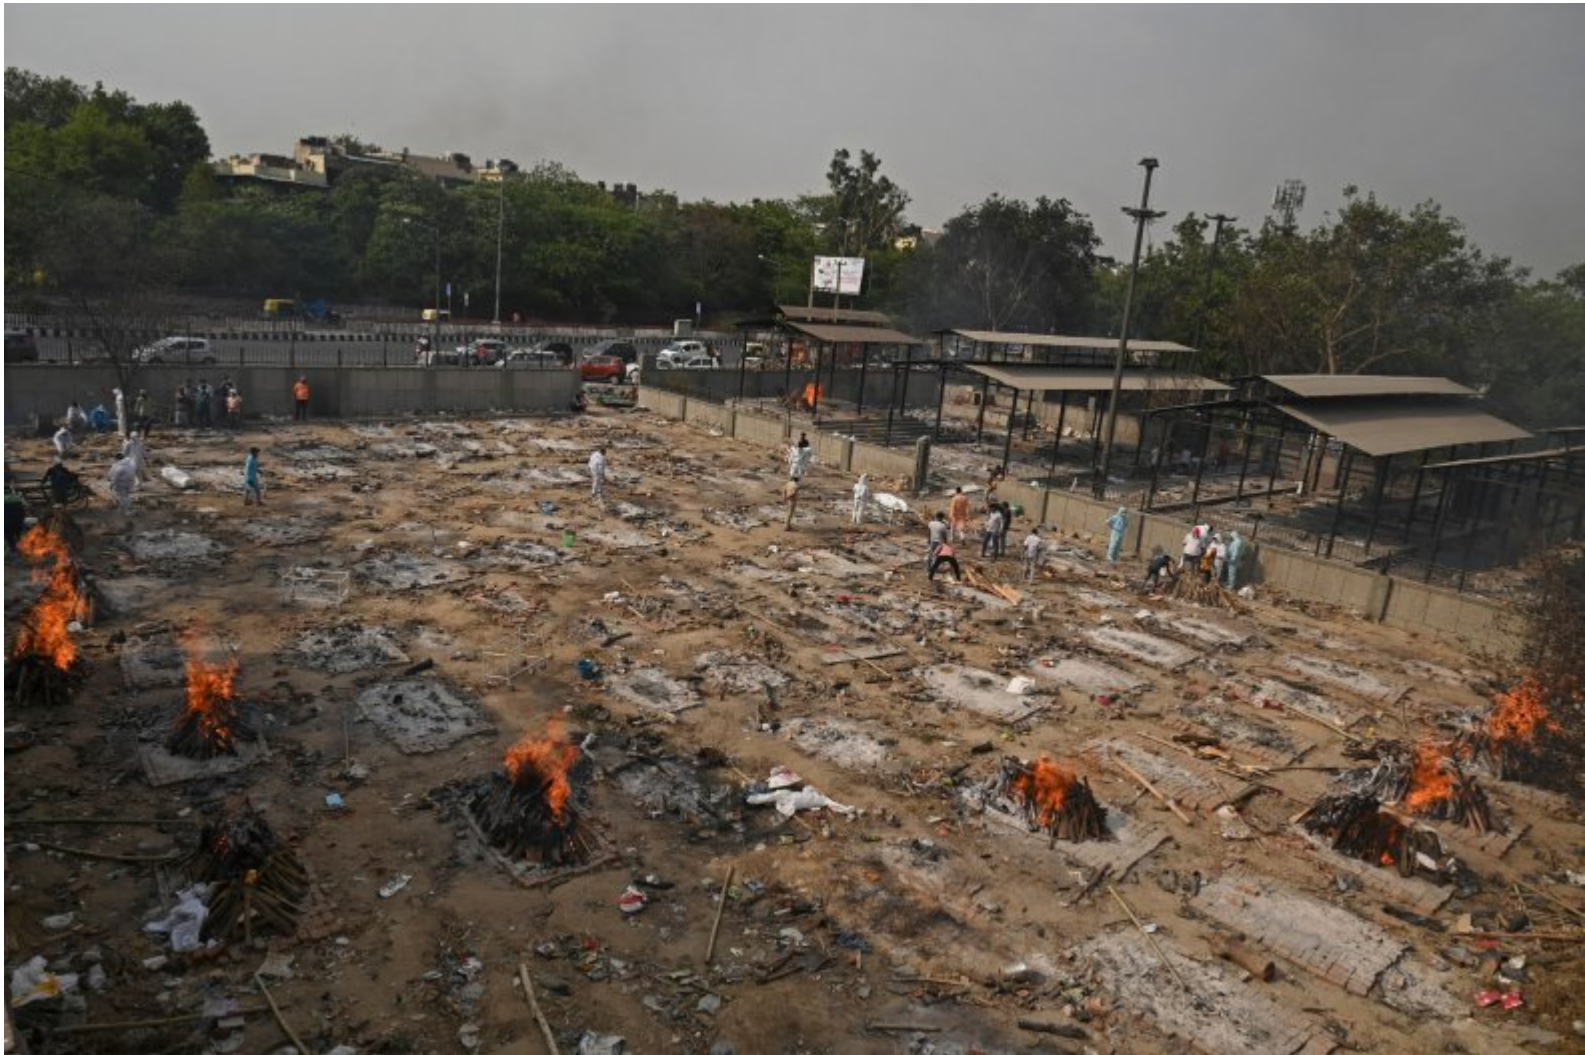

Funeral pyres of COVID-10 victims at a crematorium ground in New Delhi (Northern part of India). Source: Newsweek; Dated: May 3, 2021



## Space ran out in crematorium

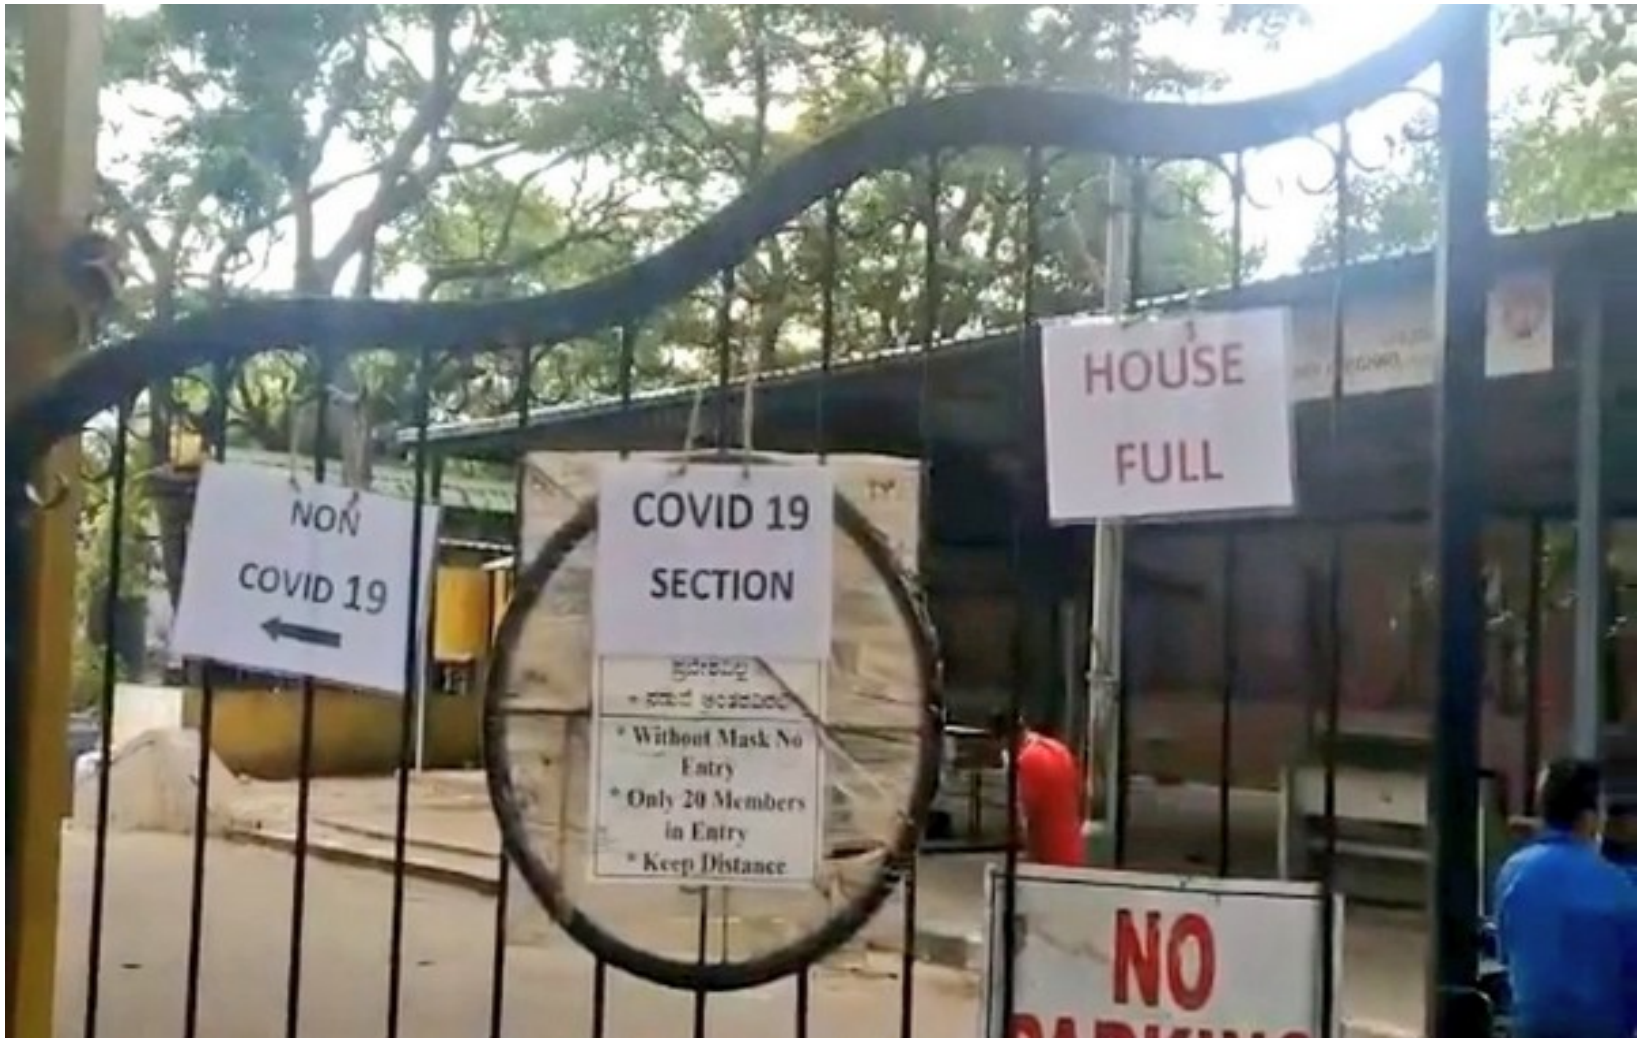

A crematorium displays a 'Housefull' board at the gate as it ran out of space in Chamrajpet, Bengaluru (Southern part of India). Source: ANI News; Dated: May 4, 2021

## Oxygen 'langar' organized by gurudwara

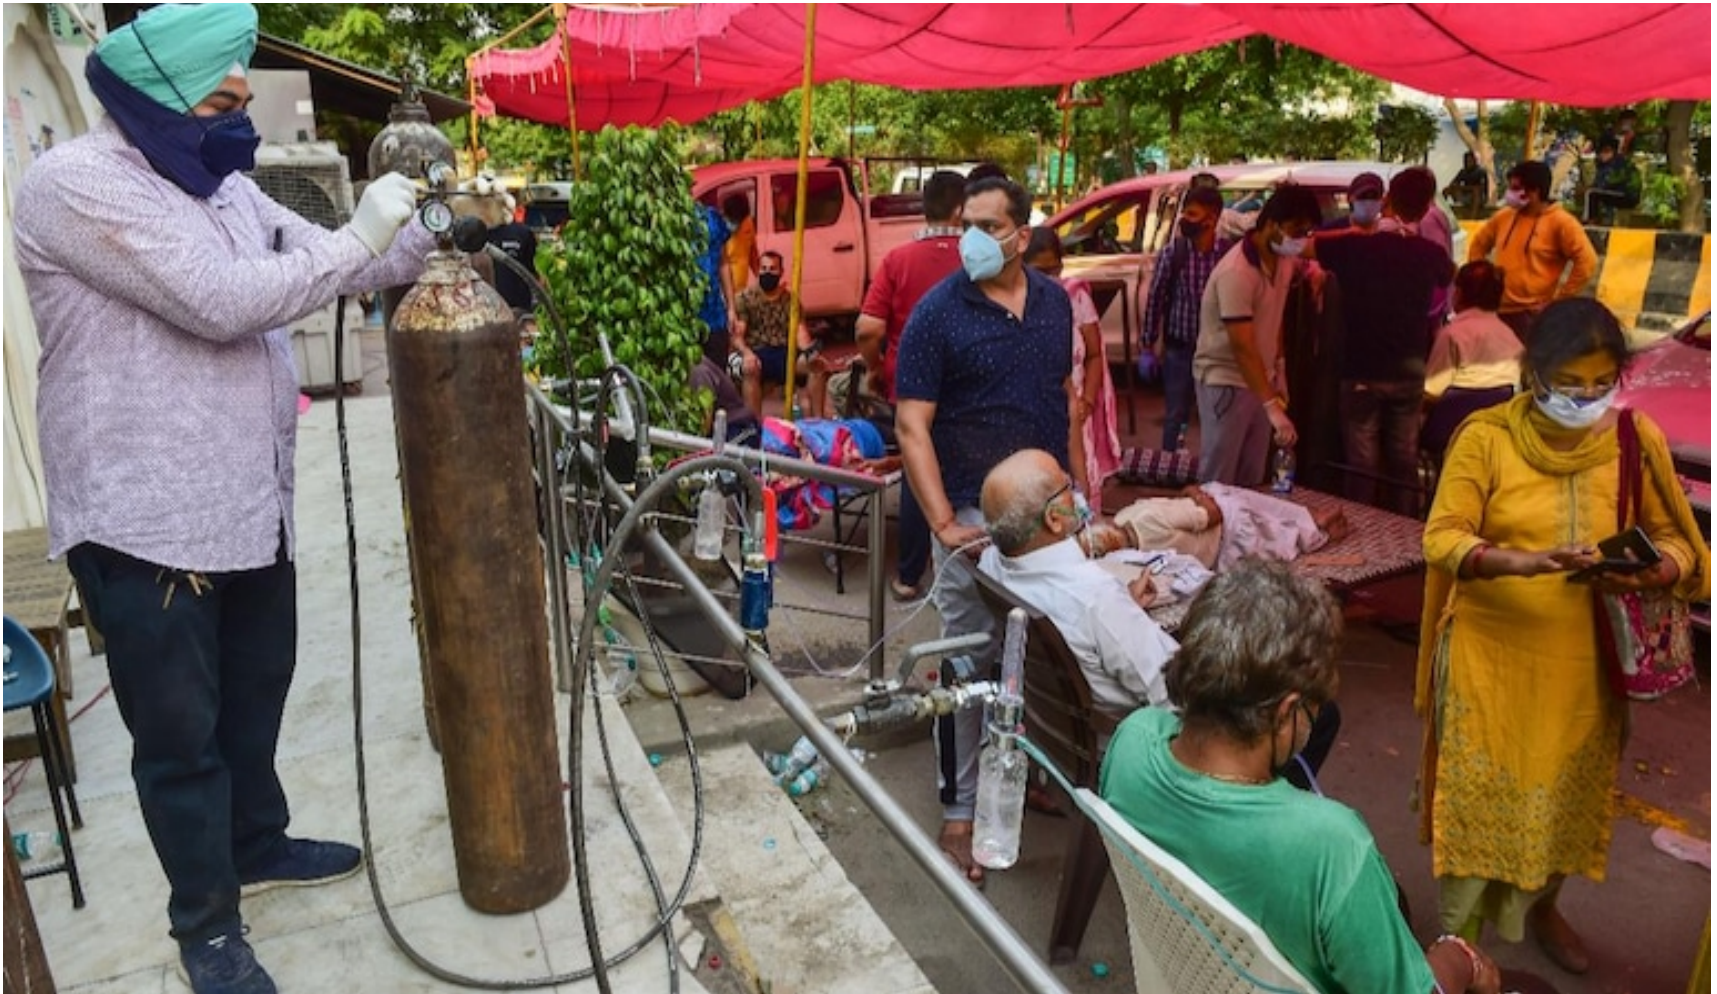

A gurudwara organized an oxygen 'langar' to provide relief for COVID-19 patients in Greater Kailash, South Delhi (Northern part of India). Source: India Today; Dated: April 30, 2021



## Sold SUV to donate oxygen cylinders

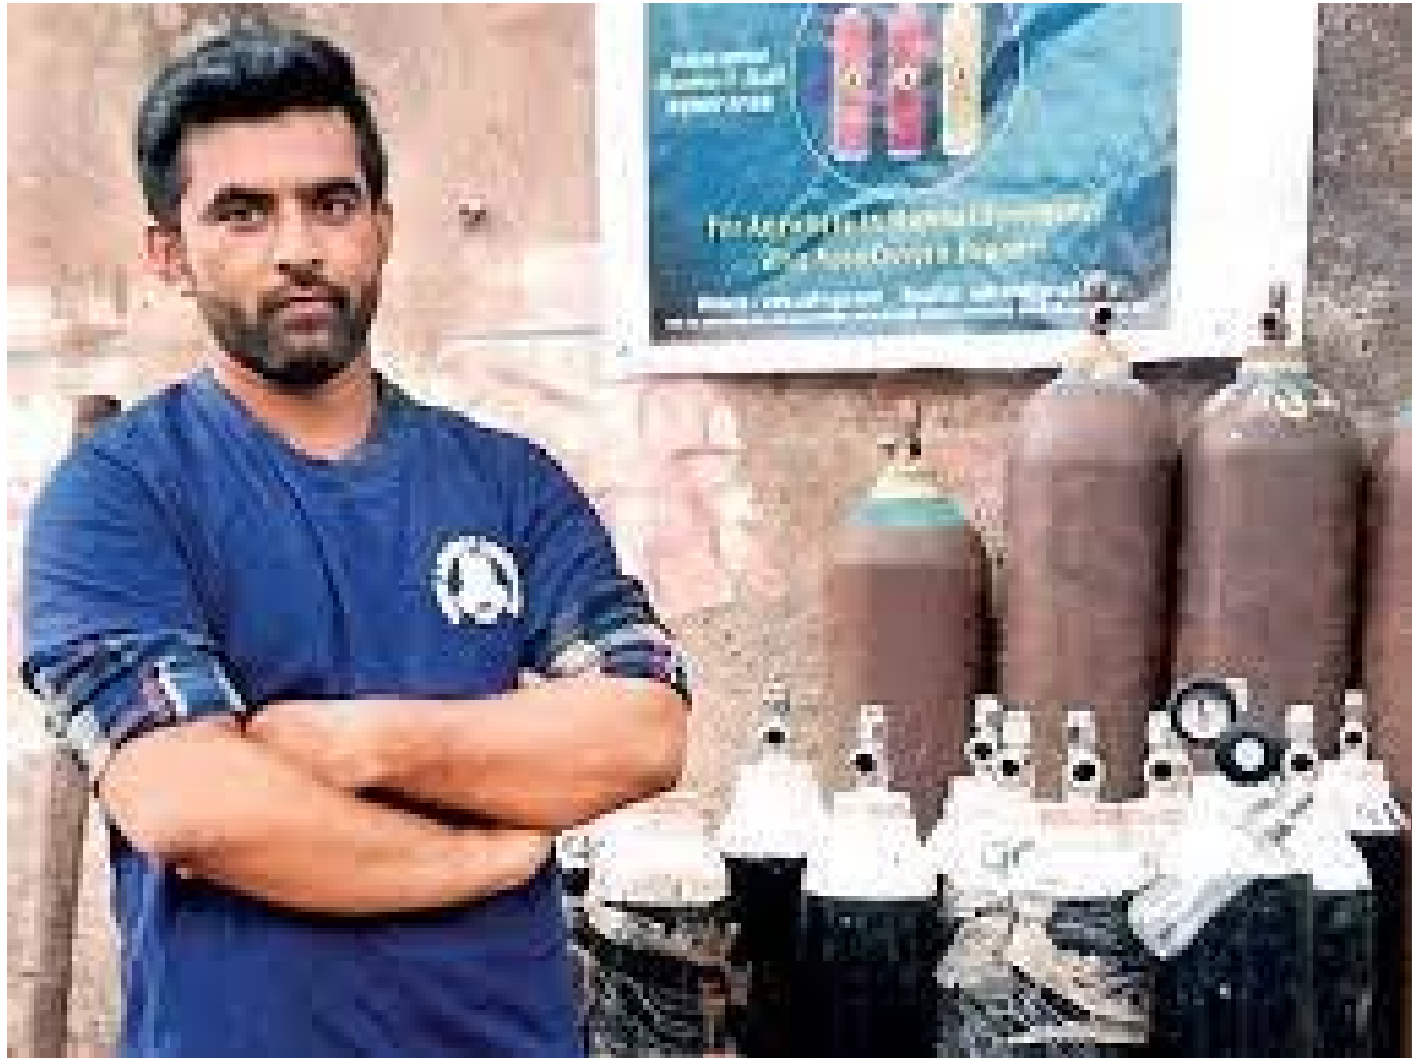

Shahnawaz Shaikh sold his Ford Endeavour to buy oxygen cylinders to 250 families for free. Source: Mumbai Mirror; Dated: June 23, 2020

## Auto-rickshaw turned into an ambulance

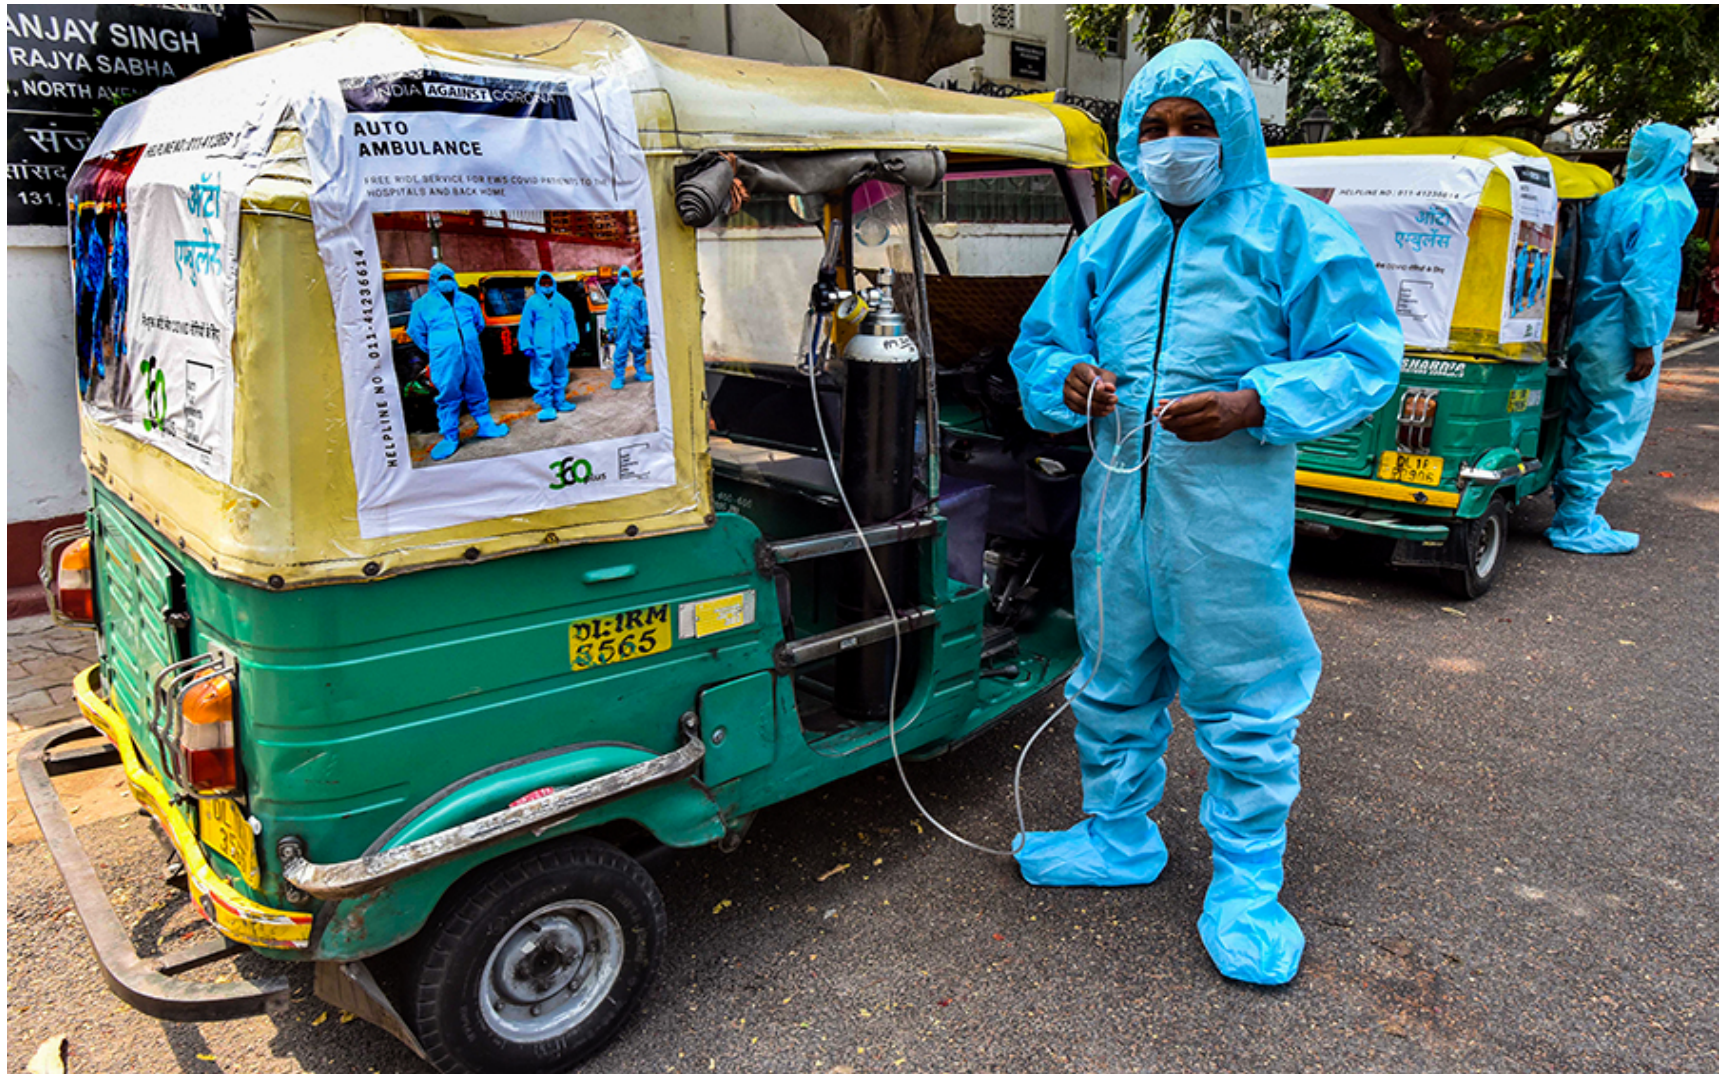

Auto-rickshaw driver in personal cover protective equipment (PPE) stands next to an autorickshaw turned into an ambulance, with oxygen facility, and offers free rides to Covid-19 patients in Delhi. Source: Forbes India; Dated: May 6, 2021



# People sharing information on oxygen concentrator

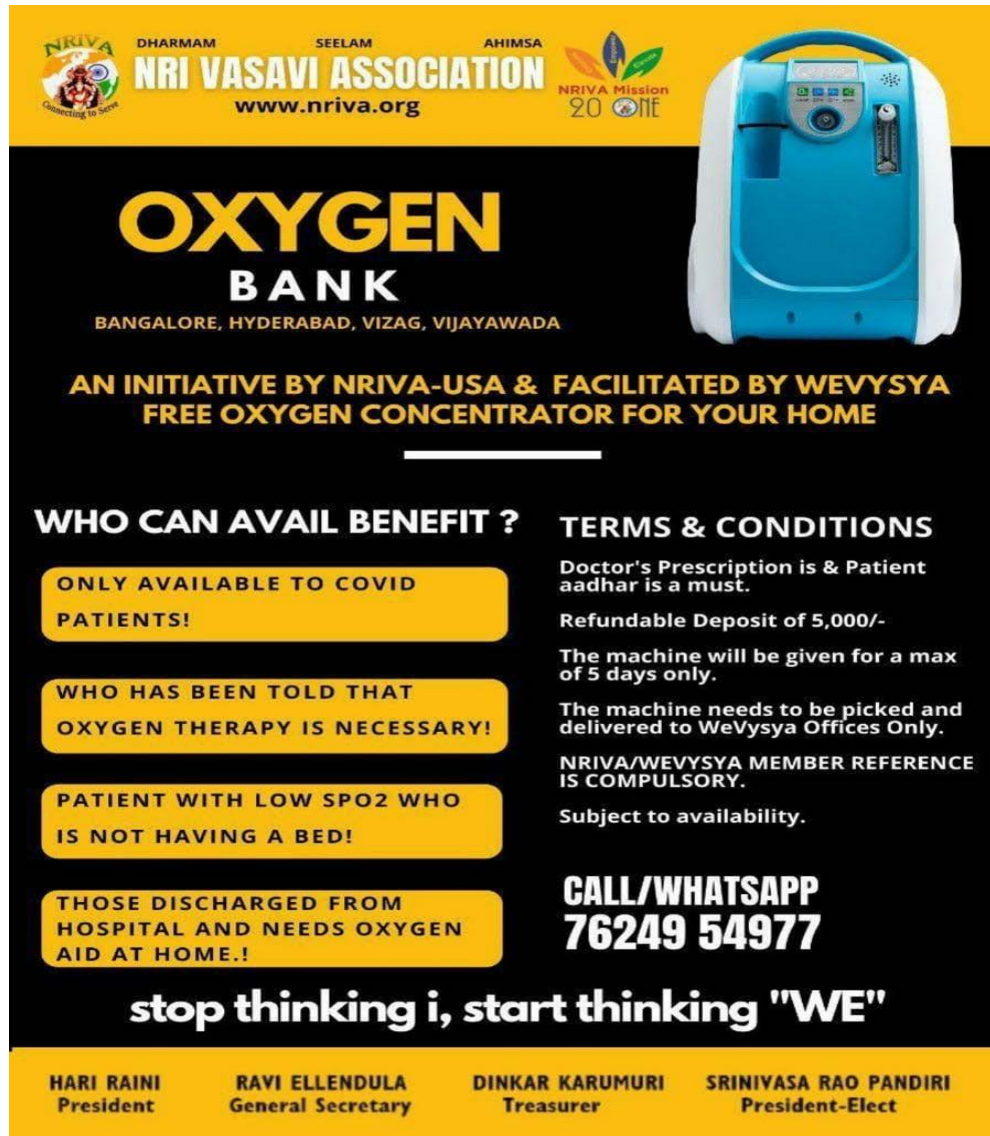

**NRIVA** DHARMAM SEELAM AHIMSA  
**NRI VASAVI ASSOCIATION**  
www.nriva.org

NRIVA Mission 2020



## OXYGEN BANK

BANGALORE, HYDERABAD, VIZAG, VIJAYAWADA

**AN INITIATIVE BY NRIVA-USA & FACILITATED BY WEVYSYA  
FREE OXYGEN CONCENTRATOR FOR YOUR HOME**

---

### WHO CAN AVAIL BENEFIT ?

- ONLY AVAILABLE TO COVID PATIENTS!
- WHO HAS BEEN TOLD THAT OXYGEN THERAPY IS NECESSARY!
- PATIENT WITH LOW SPO2 WHO IS NOT HAVING A BED!
- THOSE DISCHARGED FROM HOSPITAL AND NEEDS OXYGEN AID AT HOME.!

### TERMS & CONDITIONS

Doctor's Prescription is & Patient aadhar is a must.

Refundable Deposit of 5,000/-

The machine will be given for a max of 5 days only.

The machine needs to be picked and delivered to WeVysya Offices Only.

NRIVA/WEVYSYA MEMBER REFERENCE IS COMPULSORY.

Subject to availability.

**CALL/WHATSAPP  
76249 54977**

**stop thinking i, start thinking "WE"**

HARI RAINI President  
RAVI ELLENDULA General Secretary  
DINKAR KARUMURI Treasurer  
SRINIVASA RAO PANDIRI President-Elect

Oxygen concentrator provided by Non-Resident Indians. Source: Message shared by WhatsApp group

# CovRelief App to Help COVID-19 patients

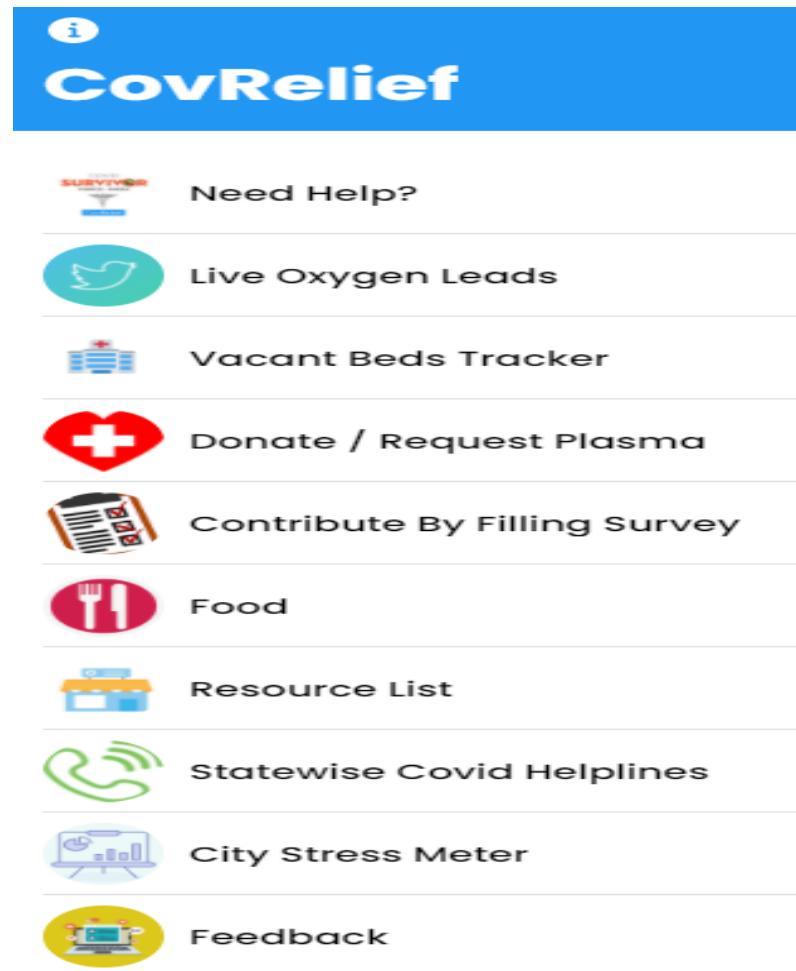

Three graduates of IIT Delhi developed a webapp CovRelief to help tracks in real-time the availability of hospital beds, lists oxygen suppliers, shares videos from doctors and has an updated list of state helpline numbers. Source: The Wire; Dated: May 7, 2021
